# Supplementary material for: The η1-H–C⋯Hg agostic interactions in the mercury complexes of N-confused porphyrin
Source: Royal Society of Chemistry journal article supplement (doi:10.1039/c8dt02895h), 2018-01-01
Supplement: c8dt02895h1.pdf [file c8dt02895h1.pdf]

## **Second Revised ESI for DT-ART-07-2018-002895**

### **The $\eta^1\text{-H-C}\cdots\text{Hg}$ agostic interactions in mercury complexes of N-confused porphyrin**

Yi-Chun Chen,<sup>a</sup> Jo-Yu Tung,<sup>\*b</sup> Ta-Kang Liu,<sup>c</sup> Wei-Joe Tsai,<sup>c</sup> Hsiang-Yin Lin<sup>c</sup>,  
Yu-Chang Chang<sup>d</sup> and Jyh-Horung Chen<sup>c</sup>

<sup>a</sup>*Department of Radiology, Taipei Veterans General Hospital, Taipei 11217, Taiwan*

<sup>b</sup>*Department of Occupational Safety and Health, Chung Hwai University of Medical  
Technology, Tainan 717, Taiwan.*

<sup>c</sup>*Department of Chemistry, National Chung Hsing University, Taichung 40227,  
Taiwan.*

<sup>d</sup>*Department of Applied Chemistry, Providence University, Taichung 43301, Taiwan.*

\*Corresponding Author. Tel: +886 62674567x815; fax: +886 62894028 (J. Y. Tung)

*E-mail addresses:* [jumpjump612@gmail.com](mailto:jumpjump612@gmail.com) (Y. C. Chen), [JyhHChen@dragon.nchu.edu.tw](mailto:JyhHChen@dragon.nchu.edu.tw) (J. H. Chen), [joyuting@mail.hwai.edu.tw](mailto:joyuting@mail.hwai.edu.tw) (J. Y. Tung), [vickchang@pu.edu.tw](mailto:vickchang@pu.edu.tw) (Y. C. Chang).

## Contents

|                                                                                                                                                                    |     |
|--------------------------------------------------------------------------------------------------------------------------------------------------------------------|-----|
| 1. Preparation of <b>8</b> .....                                                                                                                                   | S3  |
| 2. Preparation of <b>9</b> .....                                                                                                                                   | S3  |
| 3. Fig. S1. X-ray structures of (a) <b>4</b> · C <sub>8</sub> H <sub>10</sub> , (b) <b>5</b> , (c) <b>6</b> , (d) <b>7</b> , (e) <b>8</b> , and (f) <b>9</b> ..... | S5  |
| 4. Fig. S2. <sup>1</sup> H NMR spectra for <b>5</b> .....                                                                                                          | S8  |
| 5. Fig. S3. <sup>1</sup> H NMR spectra for <b>6</b> .....                                                                                                          | S9  |
| 6. Fig. S4. <sup>1</sup> H NMR spectra for <b>8</b> .....                                                                                                          | S10 |
| 7. Fig. S5. <sup>1</sup> H NMR spectra for <b>9</b> .....                                                                                                          | S11 |
| 8. Fig. S6. <sup>13</sup> C NMR spectra for <b>5</b> .....                                                                                                         | S12 |
| 9. Fig. S7. <sup>13</sup> C NMR spectra for <b>6</b> .....                                                                                                         | S13 |
| 10. Fig. S8. <sup>13</sup> C NMR spectra for <b>7</b> .....                                                                                                        | S14 |
| 11. Fig. S9. <sup>13</sup> C NMR spectra for <b>4</b> .....                                                                                                        | S15 |
| 12. Fig. S10. <sup>13</sup> C NMR spectra for <b>8</b> .....                                                                                                       | S16 |
| 13. Fig. S11. <sup>13</sup> C NMR spectra for <b>9</b> .....                                                                                                       | S17 |
| 14. Fig. S12. UV-Vis spectra of <b>5</b> .....                                                                                                                     | S18 |
| 15. Fig. S13. UV-Vis spectra of <b>6</b> .....                                                                                                                     | S18 |
| 16. Fig. S14. UV-Vis spectra of <b>7</b> .....                                                                                                                     | S19 |
| 17. Fig. S15. UV-Vis spectra of <b>4</b> .....                                                                                                                     | S19 |
| 18. Fig. S16. UV-Vis spectra of <b>8</b> .....                                                                                                                     | S20 |
| 19. Fig. S17. UV-Vis spectra of <b>9</b> .....                                                                                                                     | S20 |
| 20. Comparison of empirical formula between data of X-ray diffraction and EA<br>measurement .....                                                                  | S21 |

### Preparation of Hg(2-NCH<sub>2</sub>COOCH<sub>2</sub>C<sub>6</sub>H<sub>5</sub>-21-NCTPPH)Cl (**8**)

Compound **8** was prepared in 30 % yield in the same way as described for **9**, but using HgCl<sub>2</sub> and **12**. Compound **8** was dissolved in acetone and layered with isopropanol (IPA) [IPA/acetone = 1:1 (v/v)] to afford dark green crystals for single-crystal X-ray analysis. <sup>1</sup>H NMR (599.89 MHz, CDCl<sub>3</sub>, 298 K): δ 8.18 [d, H<sub>β</sub>(2), <sup>3</sup>J(H-H) = 4.8 Hz]; 8.10 [d, *o*-H(40, 44), <sup>3</sup>J(H-H) = 7.2 Hz]; 8.02 [d, H<sub>β</sub>(13), <sup>3</sup>J(H-H) = 4.8 Hz]; 8.00 [d, *o*-H(34, 38), <sup>3</sup>J(H-H) = 7.2 Hz]; 7.86 [d, H<sub>β</sub>(8), <sup>3</sup>J(H-H) = 4.8 Hz and <sup>4</sup>J(Hg-H) = 20.4 Hz]; 7.85 [d, H<sub>β</sub>(7), <sup>3</sup>J(H-H) = 4.8 Hz and <sup>4</sup>J(Hg-H) = 20.4 Hz]; 7.81 [bs, *o*-H (22, 26; 28, 32)]; 7.70 [d, *m*-H(41, 43), <sup>3</sup>J(H-H) = 7.2 Hz]; 7.68 [t, *p*-H(42), <sup>3</sup>J(H-H) = 7.2 Hz]; 7.61 [d, *m*-H(35, 37), <sup>3</sup>J(H-H) = 7.2 Hz]; 7.60 [d, H<sub>β</sub>(3), <sup>3</sup>J(H-H) = 4.8 Hz]; 7.59 [d, H<sub>β</sub>(12), <sup>3</sup>J(H-H) = 4.8 Hz]; 7.57 [m, *m*-H(23, 25; 29, 31) and *p*-H(26; 30)]; 7.50 [t, *p*-H(36), <sup>3</sup>J(H-H) = 7.2 Hz]; 7.40 [d, *m*-H(50, 52), <sup>3</sup>J(H-H) = 7.2 Hz]; 7.39 [m, *p*-H(51)]; 7.26 [d, *o*-H(49, 53), <sup>3</sup>J(H-H) = 7.2 Hz]; 6.53 [d, H(19), <sup>4</sup>J(H-H) = 1.2 Hz]; 5.03 [d, H(47A), <sup>4</sup>J(H-H) = 12.0 Hz]; 4.99 [d, H(47B), <sup>4</sup>J(H-H) = 12.0 Hz]; 4.56 [d, H(45A), <sup>2</sup>J(H-H) = 18.6 Hz]; 4.11 [d, H(45B), <sup>2</sup>J(H-H) = 18.6 Hz]; -0.02 [d, H(17), <sup>4</sup>J(H-H) = 1.8 Hz and <sup>4</sup>J(Hg-H) = 35.7 Hz]. MS (ESI), *m/z* (assignment, rel. intensity): 999.4 (M<sup>+</sup>, 29.07 %), 963.4 ([M-Cl]<sup>+</sup>, 41.74 %), 763.5 ([M-HgCl+H]<sup>+</sup>, 100 %). Anal. Calcd. for C<sub>53</sub>H<sub>37</sub>ClHgN<sub>4</sub>O<sub>2</sub>: C, 64.03; H, 3.98; N, 5.53. Found: C, 64.00; H, 3.68; N, 5.98. UV-vis spectrum, λ (nm) [ε × 10<sup>-3</sup> (M<sup>-1</sup> cm<sup>-1</sup>)] in CH<sub>2</sub>Cl<sub>2</sub> at 300 K: 354 (22.3), 477 (70.9), 603 (4.1), 664 (5.3), 725 (8.7).

### Preparation of Hg(2-NCH<sub>2</sub>COOCH<sub>2</sub>C<sub>6</sub>H<sub>5</sub>-21-NCTPPH)I (**9**)

A mixture of the free base 2-NCH<sub>2</sub>COOCH<sub>2</sub>C<sub>6</sub>H<sub>5</sub>NCTPPH (**12**) (0.0382 g, 0.05 mmol) and HgI<sub>2</sub> 0.0908 g (0.2 mmol) in pyridine (10 mL) was refluxed at 130°C for

2 h (Scheme 1). After concentrating the reaction mixture, the residue was dissolved in CH<sub>2</sub>Cl<sub>2</sub>, dried with anhydrous MgSO<sub>4</sub>, and filtered. The filtrate was concentrated and the residue was purified over an aluminum oxide 90 column (15 g, neutral, activity I) using CH<sub>2</sub>Cl<sub>2</sub> as the eluent to yield dark green solution of **9**. Removal of the solvent gave **9** as a dark green solid (0.0180 g, 0.0165 mmol, 33%), which was dissolved in dichloromethane and layered with ethyl acetate [EA/CH<sub>2</sub>Cl<sub>2</sub> = 1:1 (v/v)] to afford dark green crystals for single-crystal X-ray analysis. <sup>1</sup>H NMR (599.93 MHz, CDCl<sub>3</sub>, 298 K): δ 8.18 [d, H<sub>β</sub>(2), <sup>3</sup>*J*(H-H) = 4.8 Hz]; 8.11 [d, *o*-H(40, 44), <sup>3</sup>*J*(H-H) = 7.2 Hz]; 8.03 [d, H<sub>β</sub>(13)]; 8.02 [d, *o*-H(34, 38), <sup>3</sup>*J*(H-H) = 7.2 Hz]; 7.88 [d, H<sub>β</sub>(8), <sup>3</sup>*J*(H-H) = 4.8 Hz and <sup>4</sup>*J*(Hg-H) = 18.0 Hz]; 7.87 [d, H<sub>β</sub>(7), <sup>3</sup>*J*(H-H) = 4.8 Hz and <sup>4</sup>*J*(Hg-H) = 18.0 Hz]; 7.82 [bs, *o*-H (22, 26; 28, 32)]; 7.71 [d, *m*-H(41, 43), <sup>3</sup>*J*(H-H) = 7.2 Hz]; 7.75 [d, *m*-H(35, 37), <sup>3</sup>*J*(H-H) = 7.8 Hz]; 7.69 [d, *p*-H(42), <sup>3</sup>*J*(H-H) = 7.2 Hz]; 7.63 [d, H<sub>β</sub>(3), <sup>3</sup>*J*(H-H) = 4.8 Hz]; 7.61 [d, H<sub>β</sub>(12), <sup>3</sup>*J*(H-H) = 4.8 Hz]; 7.60 [d, *m*-H(35, 37), <sup>3</sup>*J*(H-H) = 7.2 Hz]; 7.58 [m, *m*-H(23, 25; 29, 31) and *p*-H(26; 30)]; 7.50 [t, *p*-H(36), <sup>3</sup>*J*(H-H) = 7.2 Hz]; 7.41 [d, *m*-H(50, 52), <sup>3</sup>*J*(H-H) = 7.2 Hz]; 7.41 [m, *p*-H(51)]; 7.30 [d, *o*-H(49, 53), <sup>3</sup>*J*(H-H) = 7.2 Hz]; 6.59 [d, H(19), <sup>4</sup>*J*(H-H) = 1.2 Hz]; 5.09 [d, H(47A), <sup>4</sup>*J*(H-H) = 12.0 Hz]; 5.02 [d, H(47B), <sup>4</sup>*J*(H-H) = 12.0 Hz]; 4.59 [d, H(45A), <sup>2</sup>*J*(H-H) = 18.6 Hz]; 4.18 [d, H(45B), <sup>2</sup>*J*(H-H) = 18.6 Hz]; -0.11 [d, H(17), <sup>4</sup>*J*(H-H) = 1.8 Hz and *J*(Hg-H) = 33.0 Hz]. MS (ESI), *m/z* (assignment, rel. intensity): 1090.1 (M<sup>+</sup>, 26.12 %), 762.4 ([M-HgI+H]<sup>+</sup>, 67.95 %), 613.4 [M-HgI+H-CH<sub>2</sub>COOCH<sub>2</sub>C<sub>6</sub>H<sub>5</sub>]<sup>+</sup>, 42.74 %). Anal. Calcd. for C<sub>53</sub>H<sub>37</sub>HgIN<sub>4</sub>O<sub>2</sub>: C, 58.43; H, 3.42; N, 5.14. Found: C, 58.13; H, 3.42; N, 5.16. UV-vis spectrum, λ (nm) [ε×10<sup>-3</sup> (M<sup>-1</sup> cm<sup>-1</sup>)] in CH<sub>2</sub> Cl<sub>2</sub> at 300 K: 356 (17.9), 479 (60.5), 606 (1.7), 659 (2.4), 730 (5.7).

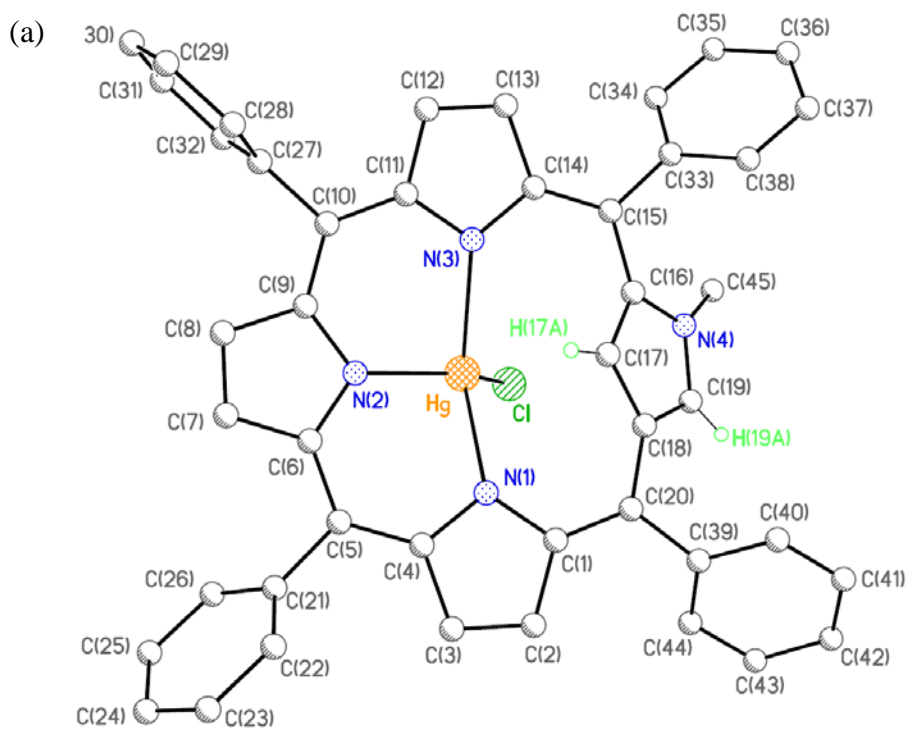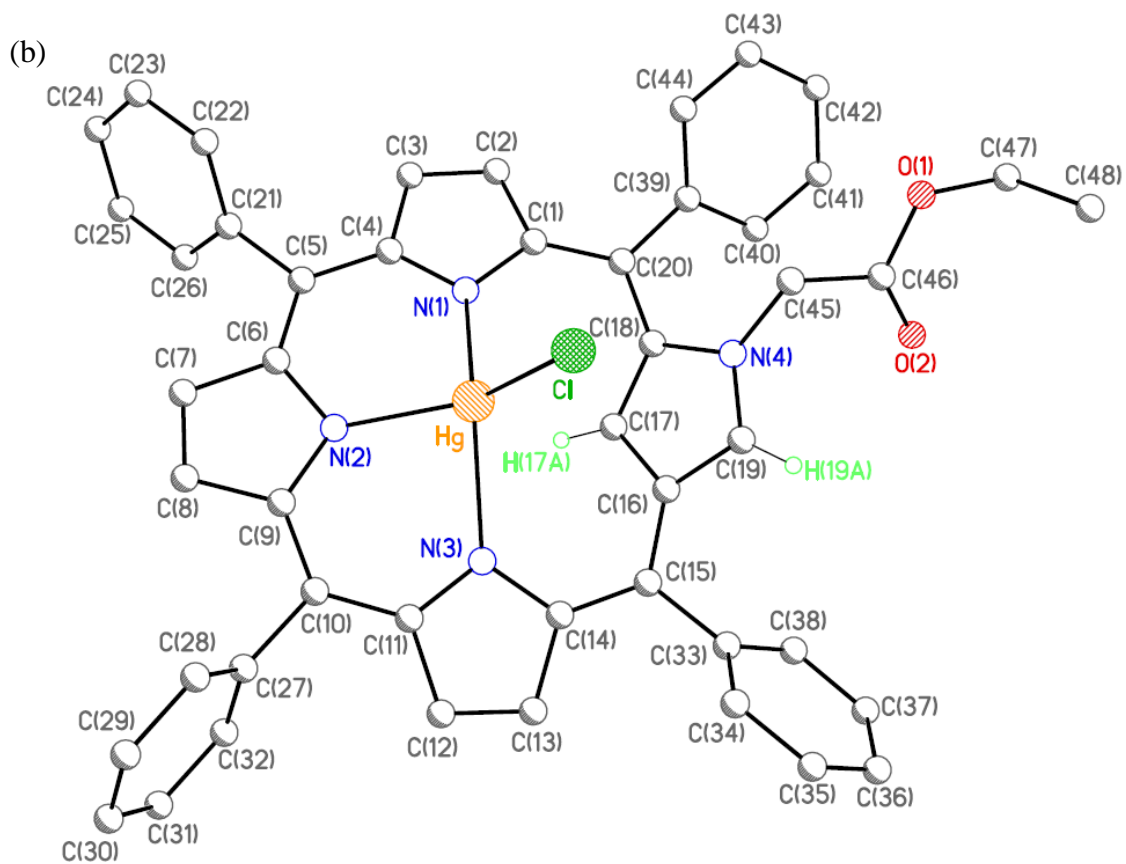

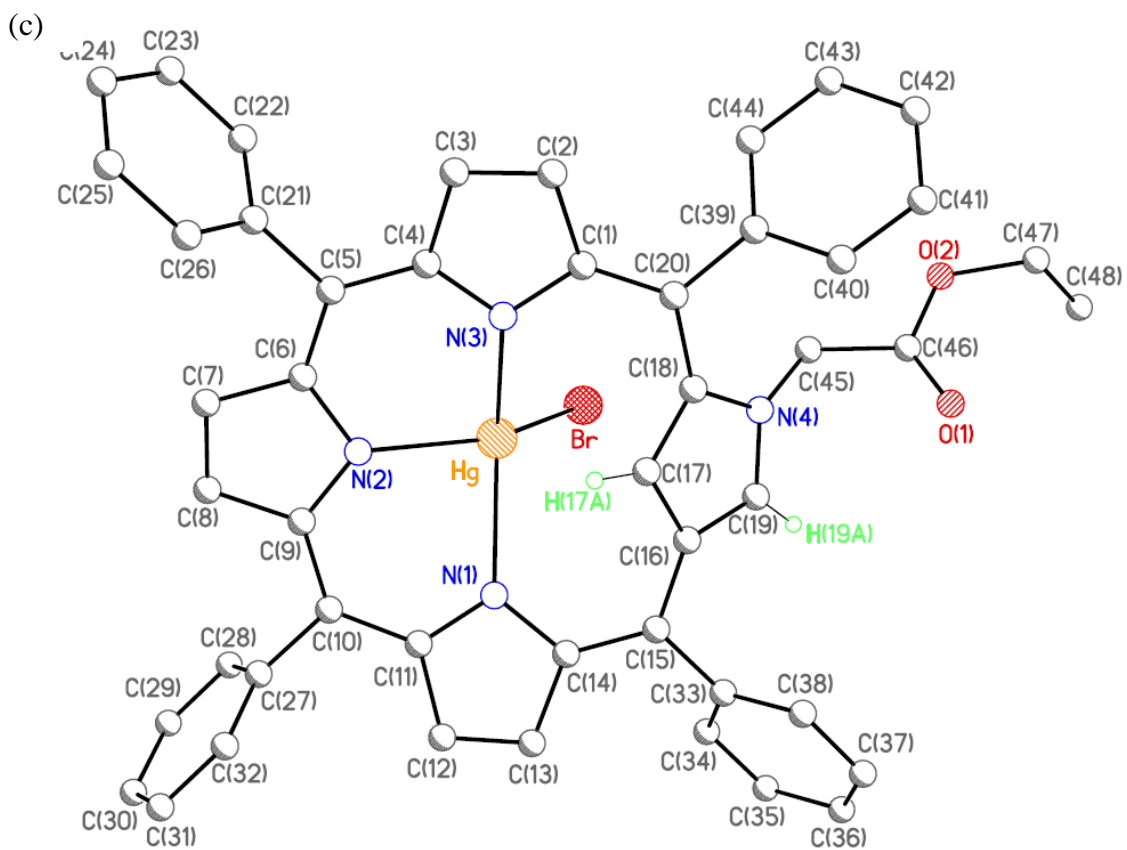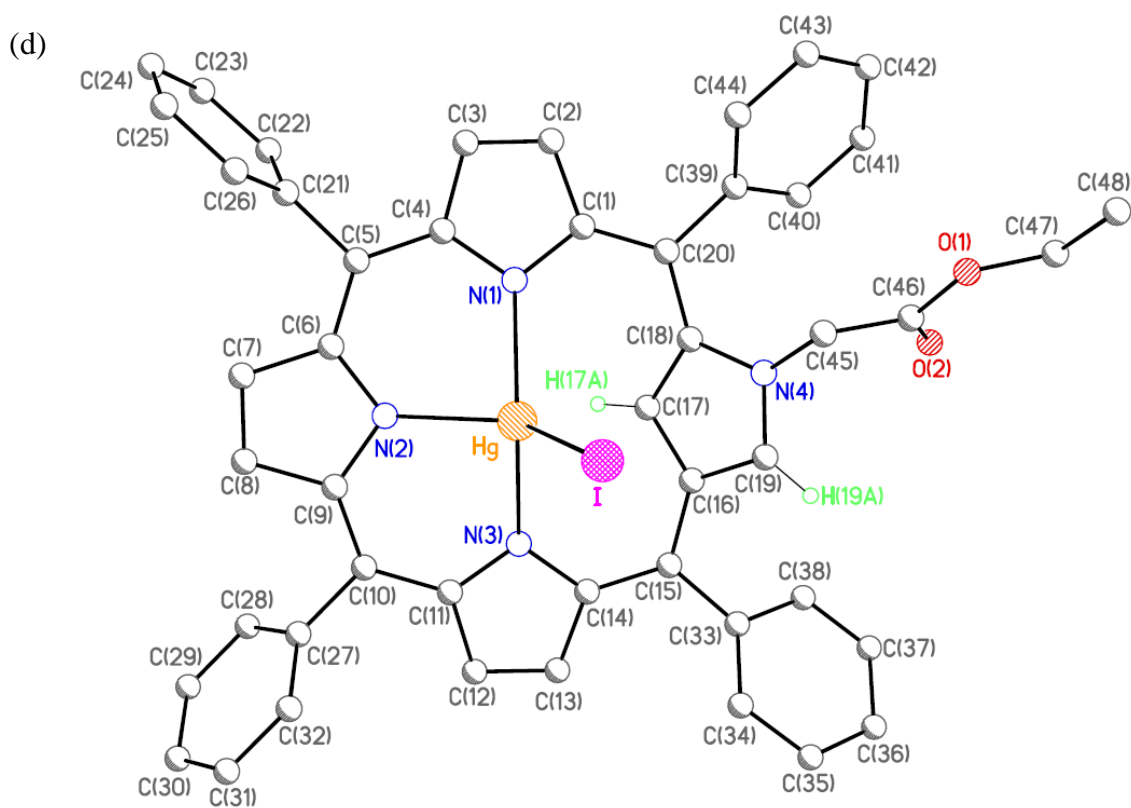

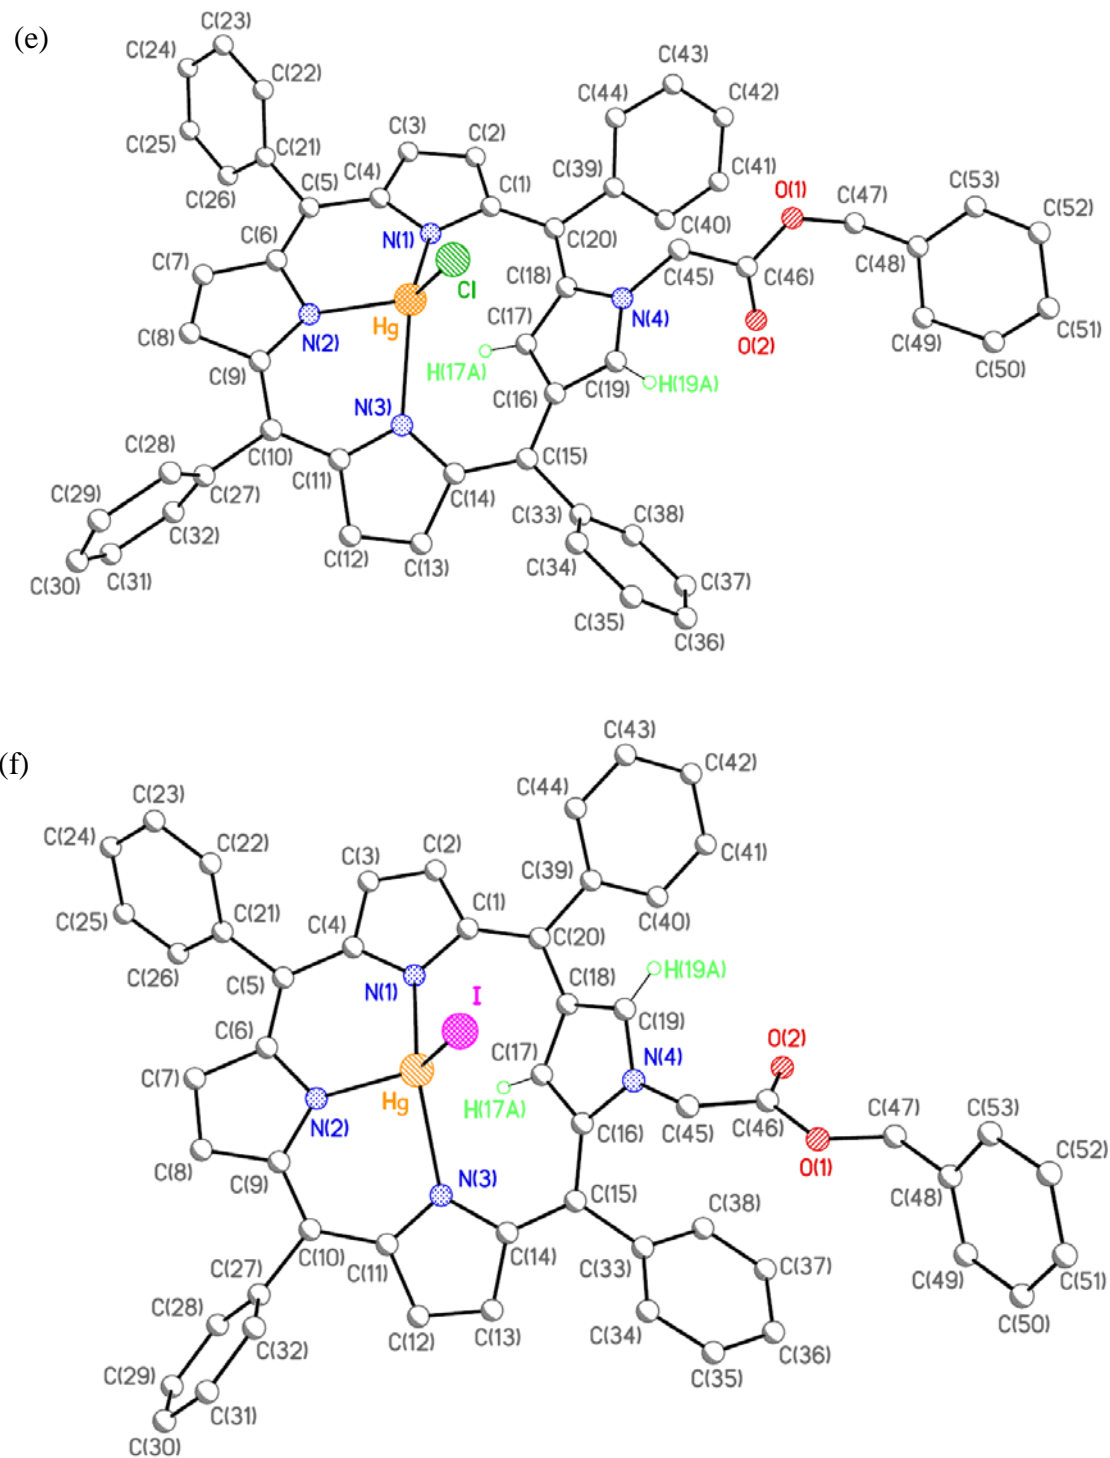

Fig. S1. X-ray structures of (a) **4** · C<sub>8</sub>H<sub>10</sub>, (b) **5**, (c) **6**, (d) **7**, (e) **8**, and (f) **9** with ellipsoids drawn at 30 % probability. All hydrogen atoms except H(17A) and H(19A), and solvent are omitted for clarity.

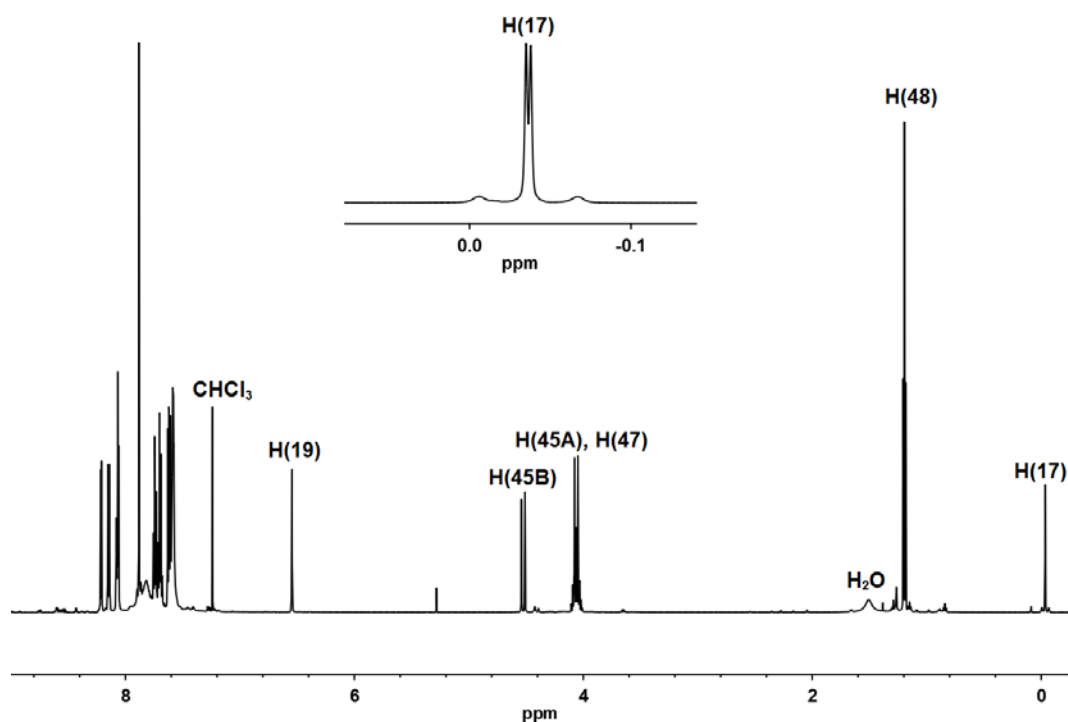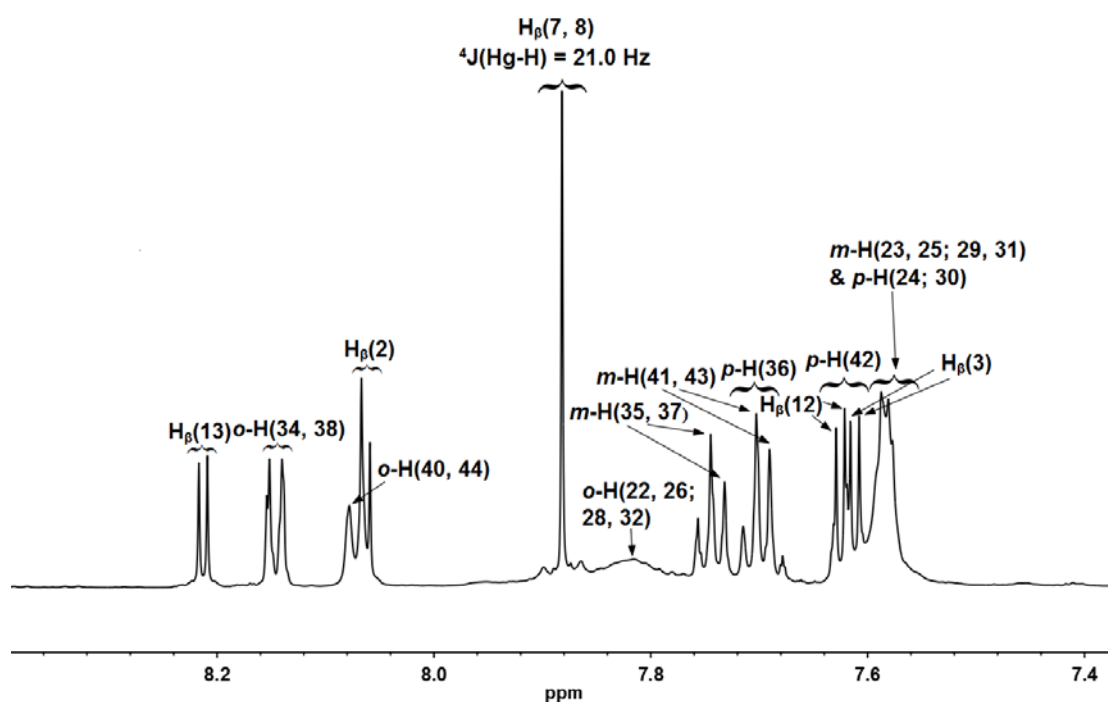

Fig S2.  $^1\text{H}$  NMR spectra for **5** at 599.93 MHz in  $\text{CDCl}_3$  at 298 K : (a) entire spectrum; (b) expansion of the region 7.4-8.4 ppm of (a) showing six different  $\beta$ -pyrrole protons  $\text{H}_\beta$  and phenyl protons ( $o$ -H,  $m$ ,  $p$ -H).



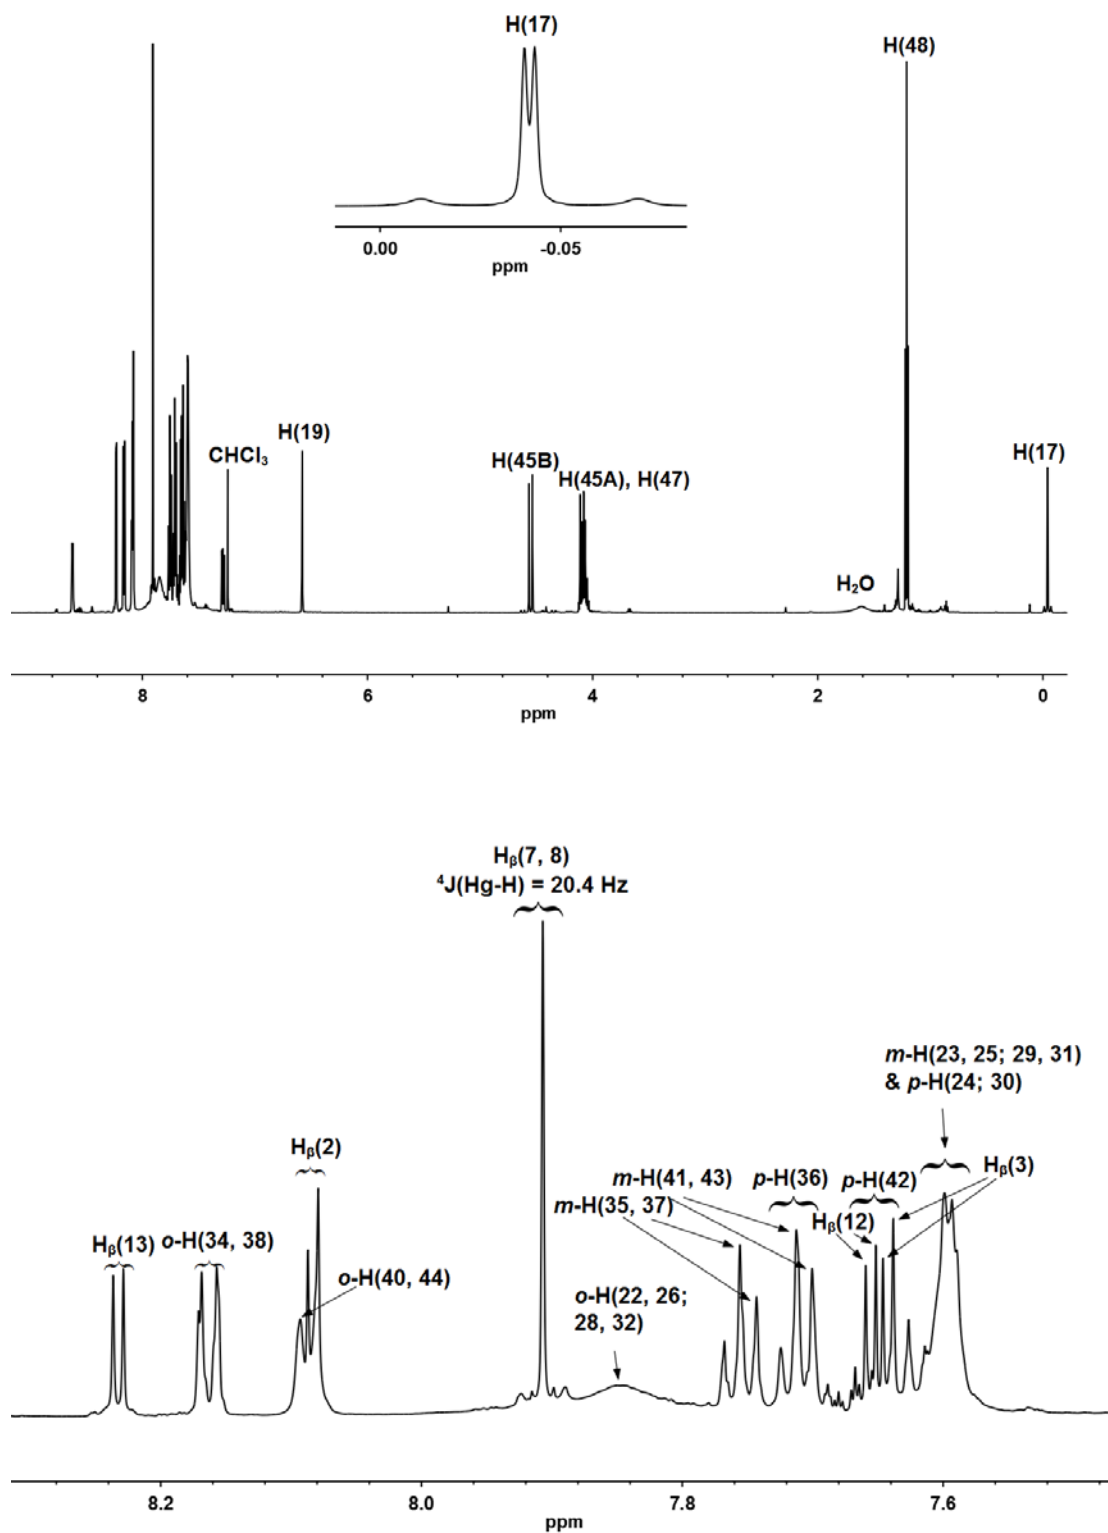

Fig S3.  $^1\text{H}$  NMR spectra for **6** at 599.87 MHz in  $\text{CDCl}_3$  at 298 K : (a) entire spectrum; (b) expansion of the region 7.4-8.4 ppm of (a) showing six different  $\beta$ -pyrrole protons  $\text{H}_\beta$  and phenyl protons ( $o\text{-H}$ ,  $m$ ,  $p\text{-H}$ ).

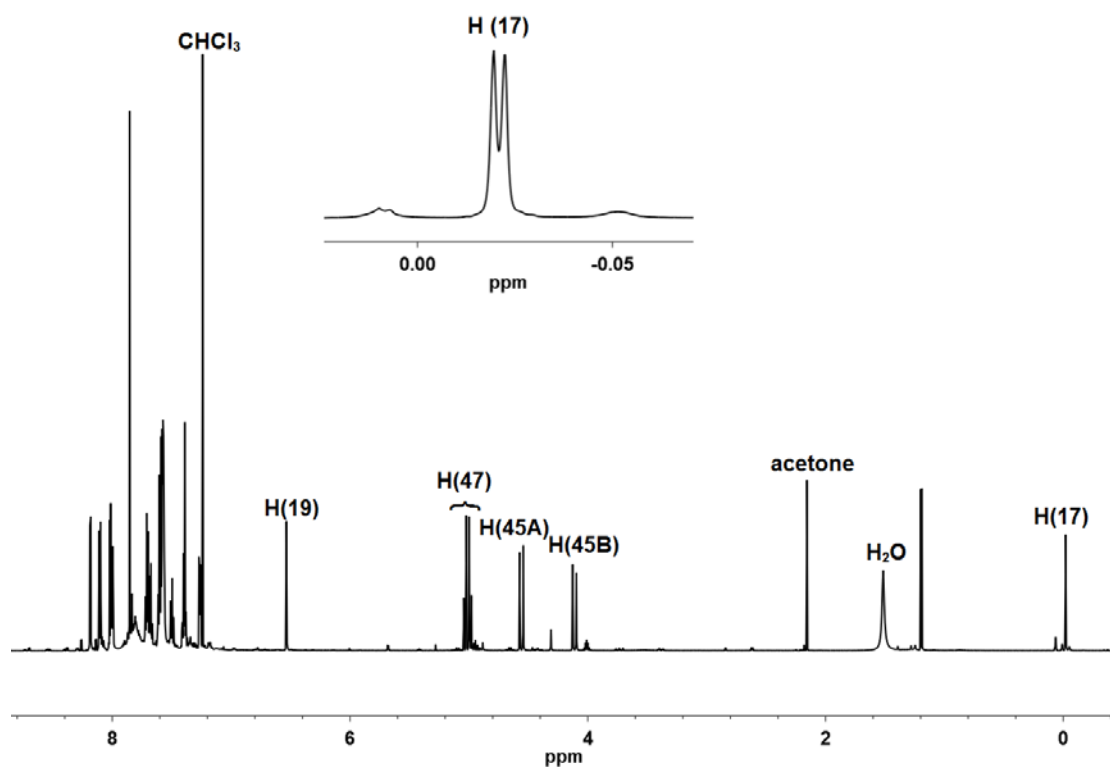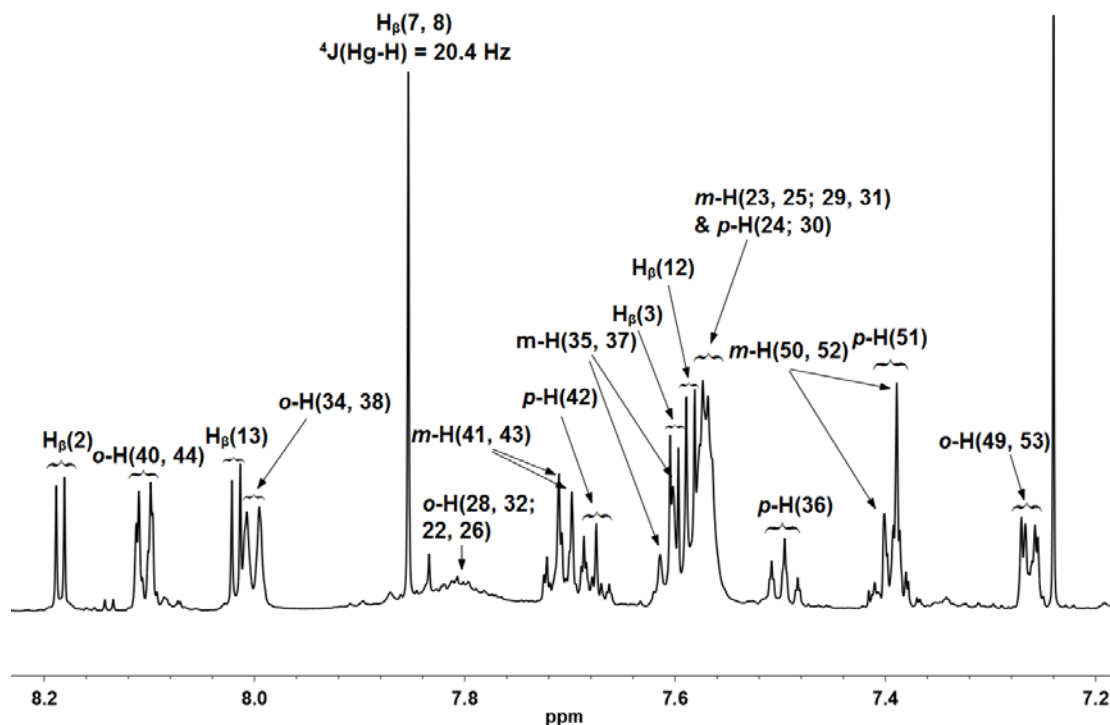

Fig S4.  $^1\text{H}$  NMR spectra for **8** at 599.93 MHz in  $\text{CDCl}_3$  at 298 K : (a) entire spectrum; (b) expansion of the region 7.2-8.4 ppm of (a) showing six different  $\beta$ -pyrrole protons  $\text{H}_\beta$  and phenyl protons ( $o$ -H,  $m$ ,  $p$ -H).

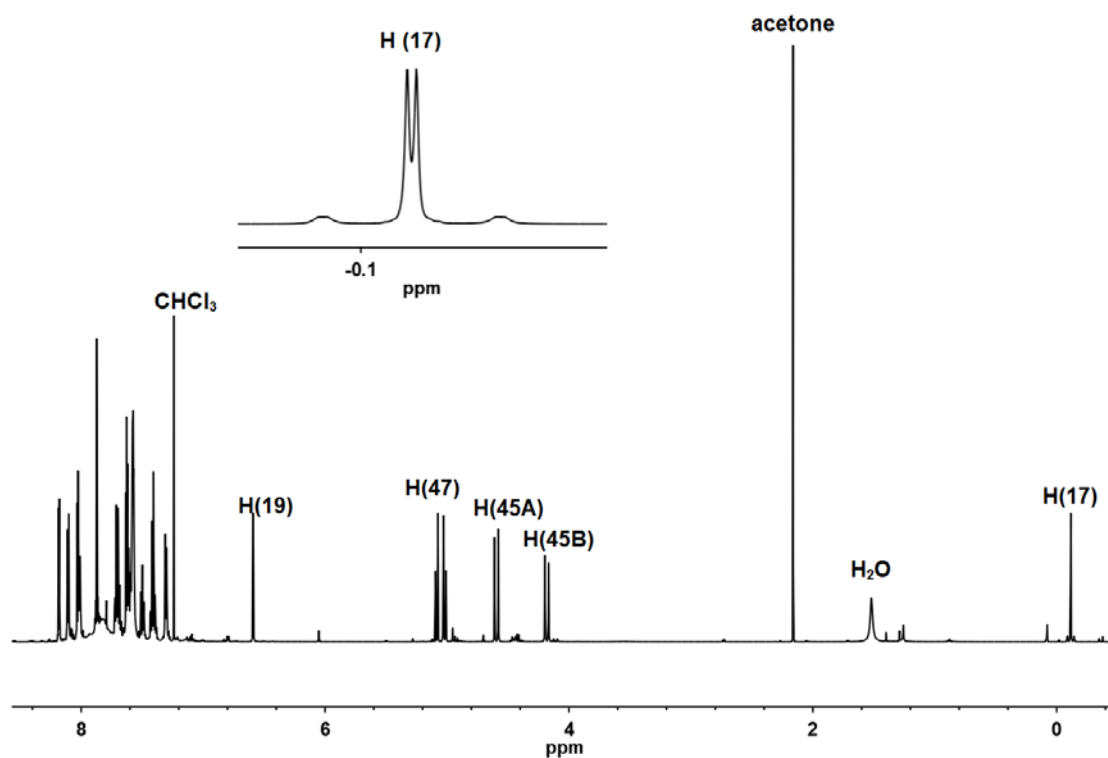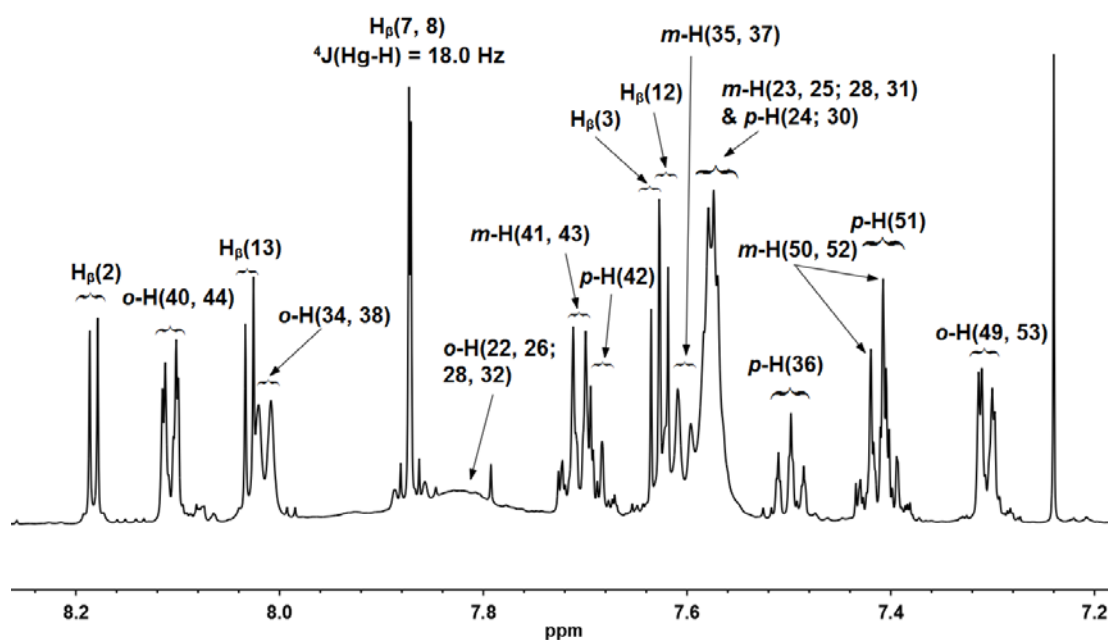

Fig S5.  $^1\text{H}$  NMR spectra for **9** at 599.93 MHz in  $\text{CDCl}_3$  at 298 K : (a) entire spectrum; (b) expansion of the region 7.2-8.4 ppm of (a) showing six different  $\beta$ -pyrrole protons  $\text{H}_\beta$  and phenyl protons (*o*-H, *m*, *p*-H).

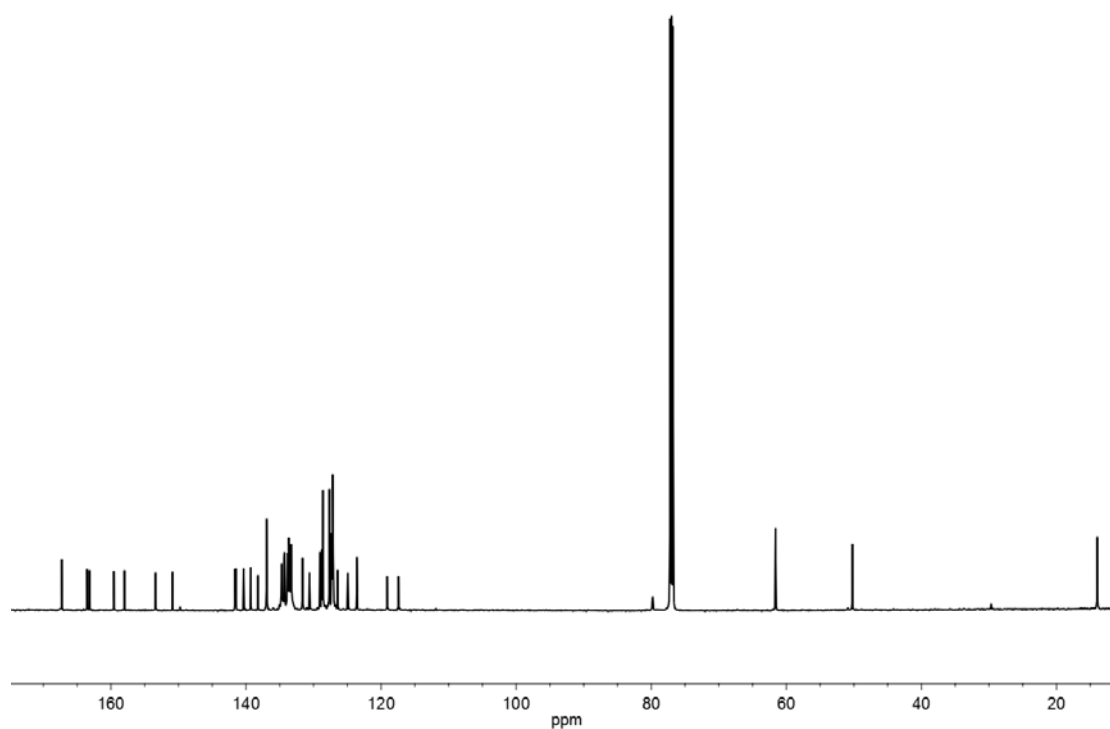

Fig. S6.  $^{13}\text{C}$  NMR spectra for **5** at 150.87 MHz in  $\text{CDCl}_3$  at  $25^\circ\text{C}$

$^{13}\text{C}$  NMR (150.87 MHz,  $\text{CDCl}_3$ ,  $25^\circ\text{C}$ , partial data) of **5** :

$\delta$  167.3 [s, C(46)]; 163.6 (s) and 153.4 (s) for  $\text{C}_\alpha(1)$  and  $\text{C}_\alpha(4)$ ; 163.2 (s) and 150.9 (s) for  $\text{C}_\alpha(11)$  and  $\text{C}_\alpha(14)$ ; 159.6 (s) and 158.0 (s) for  $\text{C}_\alpha(6)$  and  $\text{C}_\alpha(9)$ ; 140.4 [s, C(33)]; 139.3 [s, C(39)]; 138.2 [s, C(15)]; 137.0 [s, C(34, 38)]; 134.7 [s, C(40, 44)]; 134.4 [s,  $\text{C}_\beta(13)$ ]; 134.3 [s,  $\text{C}_\beta(7)$ ]; 133.9 [s,  $\text{C}_\beta(8)$ ]; 133.7 [s,  $\text{C}_\beta(2)$ ]; 133.3 [s,  $\text{C}_\beta(3)$ ]; 131.6 [s,  $\text{C}_\beta(12)$ ]; 130.6 [s, C(18)]; 129.1 [s, C(36)]; 128.8 [s, C(42)]; 128.6 [s, C(41, 43)]; 127.7 [s, C(35, 37)]; 126.5 [s, C(16)]; 125.0 [s, C(20)]; 123.6 [s,  $\text{C}_\alpha(19)$ ]; 79.8 [s, C(17)]; 61.6 [s, C(47)]; 50.2 [s, C(45)]; 14.0 [s, C(48)].

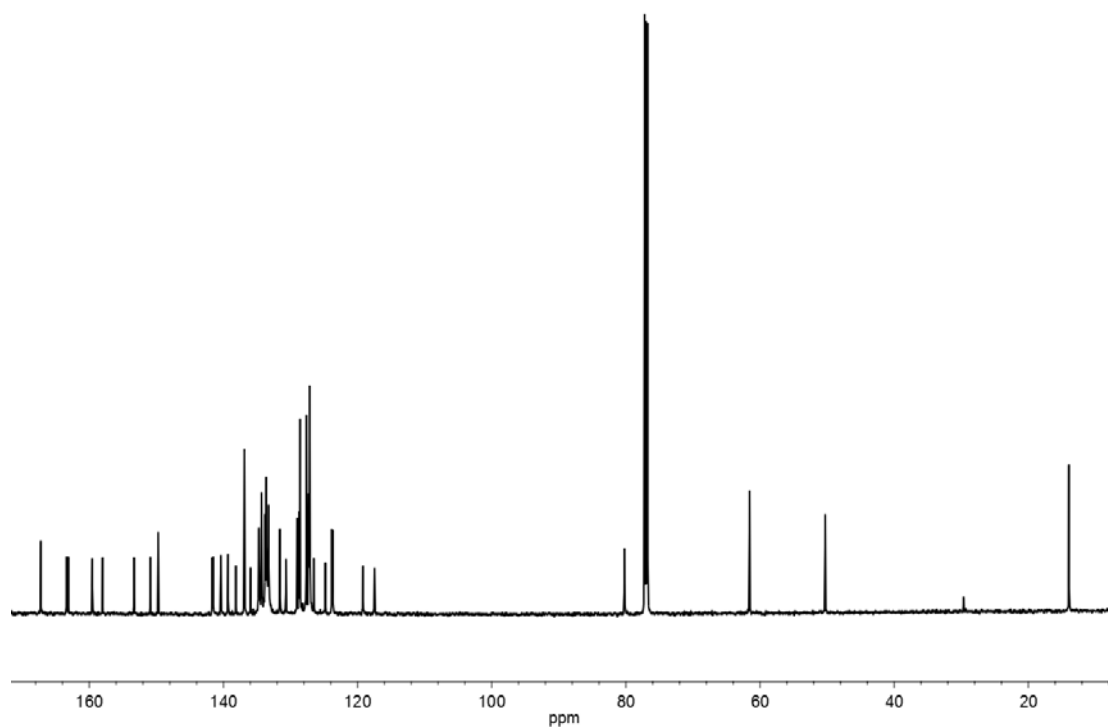

Fig. S7.  $^{13}\text{C}$  NMR spectra for **6** at 150.87 MHz in  $\text{CDCl}_3$  at  $25^\circ\text{C}$

$^{13}\text{C}$  NMR (150.87 MHz,  $\text{CDCl}_3$ ,  $25^\circ\text{C}$ , partial data) of **6** :

$\delta$  167.2 [s, C(46)]; 163.4 (s) and 153.3 (s) for  $\text{C}_\alpha(1)$  and  $\text{C}_\alpha(4)$ ; 163.1 (s) and 150.9 (s) for  $\text{C}_\alpha(11)$  and  $\text{C}_\alpha(14)$ ; 159.6 (s) and 158.0 (s) for  $\text{C}_\alpha(6)$  and  $\text{C}_\alpha(9)$ ; 140.4 [s, C(33)]; 139.3 [s, C(39)]; 138.2 [s, C(15)]; 136.9 [s, C(34, 38)]; 134.7 [s, C(40, 44)]; 134.3 [s,  $\text{C}_\beta(13)$ ]; 134.3 [s,  $\text{C}_\beta(7)$ ]; 133.8 [s,  $\text{C}_\beta(8)$ ]; 133.6 [s,  $\text{C}_\beta(2)$ ]; 133.3 [s,  $\text{C}_\beta(3)$ ]; 131.6 [s,  $\text{C}_\beta(12)$ ]; 130.7 [s, C(18)]; 129.0 [s, C(36)]; 128.8 [s, C(42)]; 128.6 [s, C(41, 43)]; 127.6 [s, C(35, 37)]; 126.5 [s, C(16)]; 124.8 [s, C(20)]; 123.9 [s,  $\text{C}_\alpha(19)$ ]; 80.2 [s, C(17)]; 61.6 [s, C(47)]; 50.3 [s, C(45)]; 14.0 [s, C(48)].

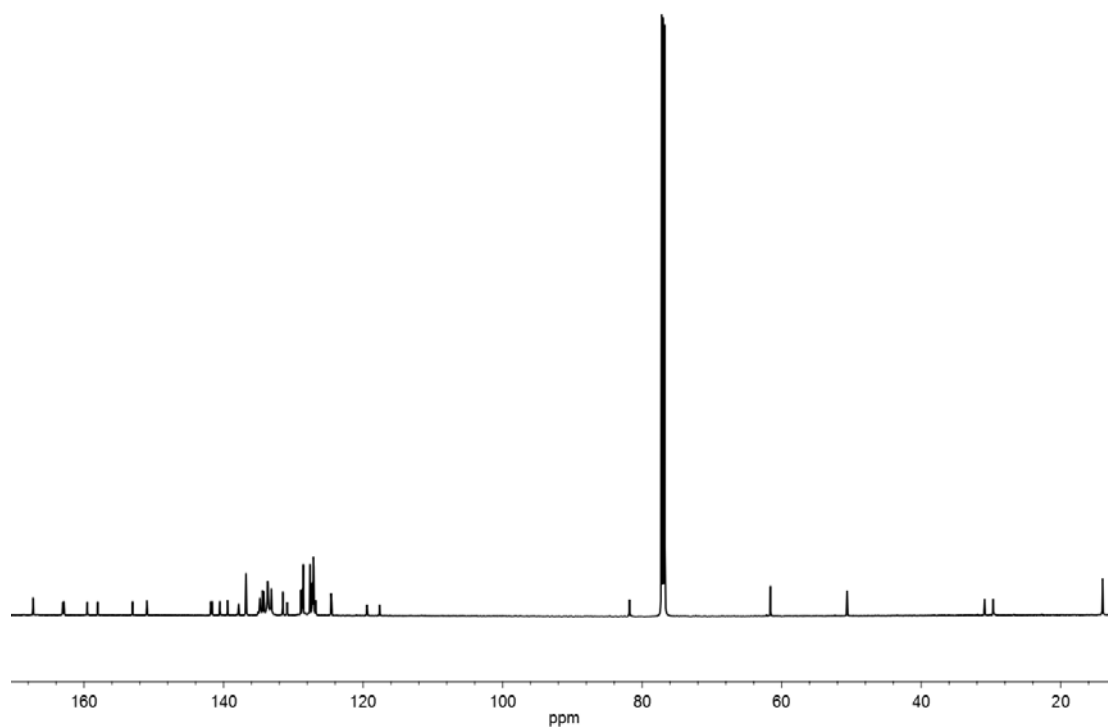

Fig. S8.  $^{13}\text{C}$  NMR spectra for **7** at 150.87 MHz in  $\text{CDCl}_3$  at  $25^\circ\text{C}$

$^{13}\text{C}$  NMR (150.87 MHz,  $\text{CDCl}_3$ ,  $25^\circ\text{C}$ , partial data) of **7** :

$\delta$  167.3 [s, C(46)]; 163.1 (s) and 153.1 (s) for  $\text{C}_\alpha(1)$  and  $\text{C}_\alpha(4)$ ; 162.9 (s) and 151.0 (s) for  $\text{C}_\alpha(11)$  and  $\text{C}_\alpha(14)$ ; 159.5 (s) and 158.0 (s) for  $\text{C}_\alpha(6)$  and  $\text{C}_\alpha(9)$ ; 140.5 [s, C(33)]; 139.4 [s, C(39)]; 137.8 [s, C(15)]; 136.8 [s, C(34, 38)]; 134.8 [s, C(40, 44)]; 134.4 [s,  $\text{C}_\beta(13)$ ]; 134.2 [s,  $\text{C}_\beta(7)$ ]; 133.7 [s,  $\text{C}_\beta(8)$ ]; 133.6 [s,  $\text{C}_\beta(2)$ ]; 133.2 [s,  $\text{C}_\beta(3)$ ]; 131.5 [s,  $\text{C}_\beta(12)$ ]; 130.9 [s, C(18)]; 128.9 [s, C(36)]; 128.7 [s, C(42)]; 128.6 [s, C(41, 43)]; 127.6 [s, C(35, 37)]; 126.8 [s, C(16)]; 124.6 [s, C(20)]; 124.5 [s,  $\text{C}_\alpha(19)$ ]; 81.8 [s, C(17)]; 61.6 [s, C(47)]; 50.6 [s, C(45)]; 14.0 [s, C(48)].

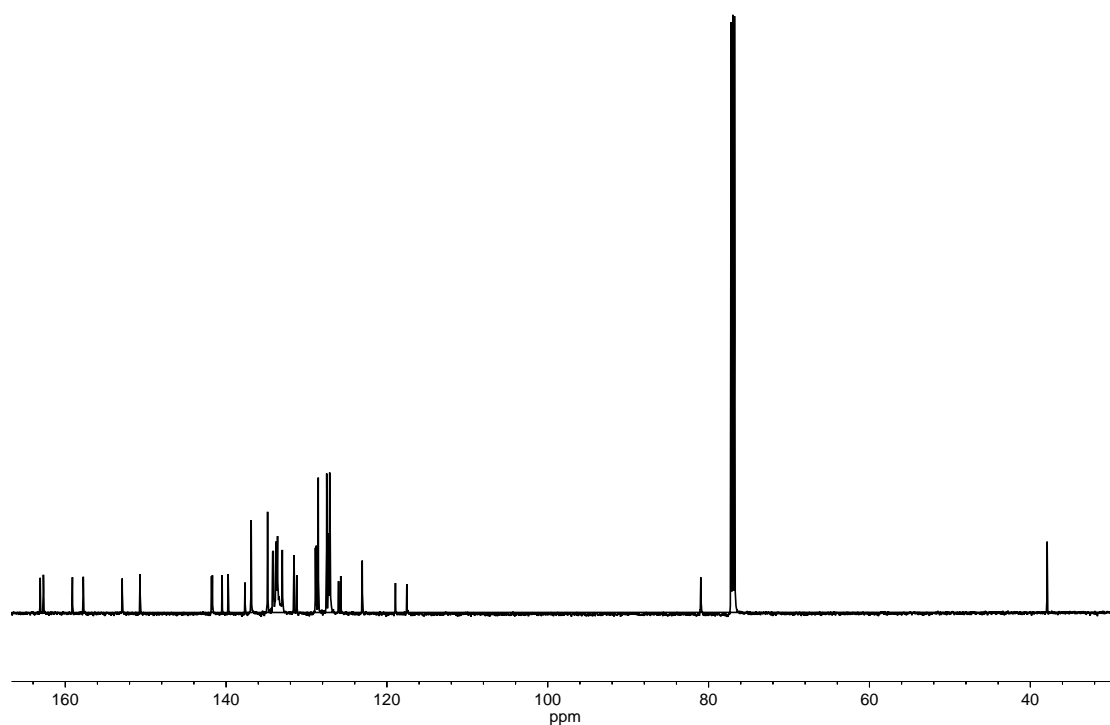

Fig. S9.  $^{13}\text{C}$  NMR spectra for **4** at 150.87 MHz in  $\text{CDCl}_3$  at  $25^\circ\text{C}$

$^{13}\text{C}$  NMR (150.85 MHz,  $\text{CDCl}_3$ ,  $25^\circ\text{C}$ , partial data) of **4** :

$\delta$ 163.1 (s) and 152.9 (s) for  $\text{C}_\alpha(11)$  and  $\text{C}_\alpha(14)$ ; 162.7 (s) and 150.7 (s) for  $\text{C}_\alpha(1)$  and  $\text{C}_\alpha(4)$ ; 159.1 (s) and 157.8 (s) for  $\text{C}_\alpha(6)$  and  $\text{C}_\alpha(9)$ ; 140.5 [s, C(20)]; 136.9 [s, C(40, 44)]; 134.9 [s, C(34, 38)]; 134.2 [s,  $\text{C}_\beta(2)$ ]; 134.1 [s,  $\text{C}_\beta(7)$ ]; 133.8 [s,  $\text{C}_\beta(8)$ ]; 133.6 [s,  $\text{C}_\beta(13)$ ]; 133.0 [s,  $\text{C}_\beta(12)$ ]; 131.6 [s,  $\text{C}_\beta(3)$ ]; 131.2 [s, C(16)]; 128.9 [s, C(42)]; 128.8 [s, C(36)]; 128.6 [s, C(35, 37)]; 127.5 [s, C(41, 43)]; 126.0 [s, C(15)]; 125.8 [s, C(18)]; 123.1 [s,  $\text{C}_\alpha(19)$ ]; 81.0 [s, C(17)]; 37.9 [s, C(45)].

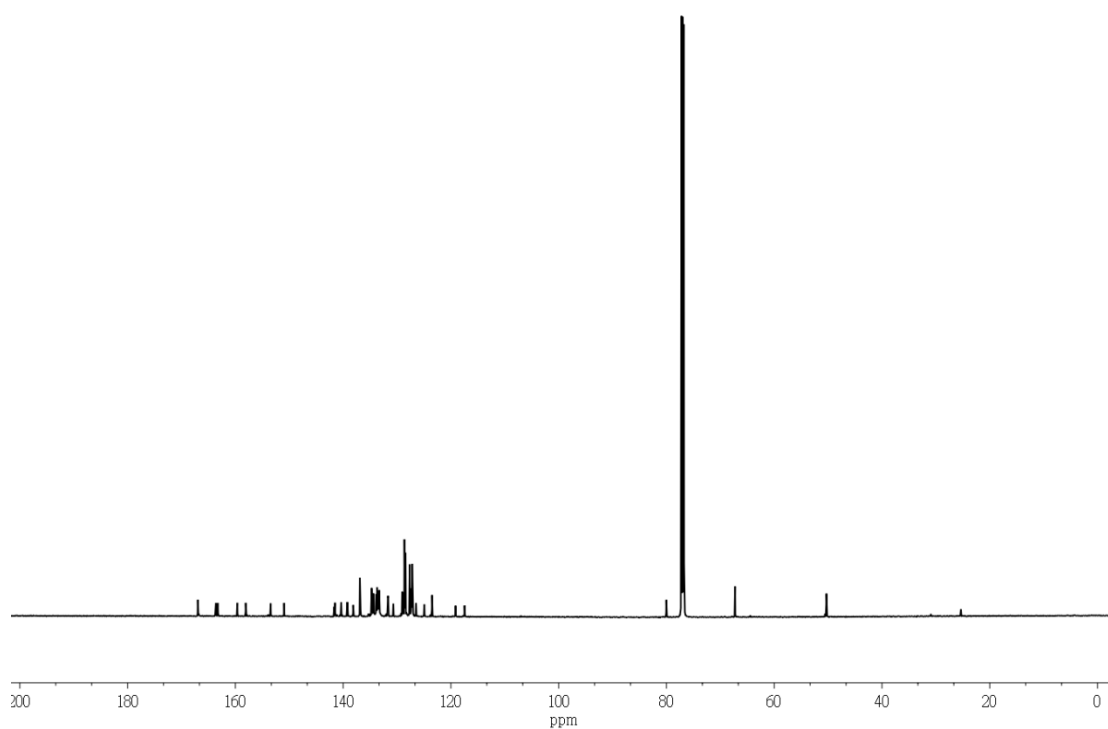

Fig. S10.  $^{13}\text{C}$  NMR spectra for **8** at 150.87 MHz in  $\text{CDCl}_3$  at  $25^\circ\text{C}$

$^{13}\text{C}$  NMR (150.85 MHz,  $\text{CDCl}_3$ ,  $25^\circ\text{C}$ , partial data) of **8** :

$\delta$ 167.0 [s, C(46)]; 163.6 (s) and 153.5 (s) for  $\text{C}_\alpha$ (1) and  $\text{C}_\alpha$ (4);  $\delta$ 163.3 (s) and 153.5 (s) for  $\text{C}_\alpha$ (11) and  $\text{C}_\alpha$ (14); 160.0 (s) and 158.1 (s) for  $\text{C}_\alpha$ (6) and  $\text{C}_\alpha$ (9);  $\delta$ 140.4 [s, C(39)] ; 139.2 [s, C(33)] ; 138.2 [s, C(20)]; 136.9 [s, C(40, 44)] ; 134.7 [s, C(34, 38)]; 134.7 [s, C(48)]; 134.4 [s,  $\text{C}_\beta$ (2)]; 134.3 [s,  $\text{C}_\beta$ (8)]; 133.9 [s,  $\text{C}_\beta$ (7)]; 133.7 [s,  $\text{C}_\beta$ (13)]; 133.3 [s,  $\text{C}_\beta$ (12)]; 131.7 [s,  $\text{C}_\beta$ (3)] ; 130.7 [s, C(18)]; 129.1 [s, C(42)]; 128.9 [s, C(36)]; 128.4 (s) and 127.1 (s) for C(49, 53); 127.7 [s, C(41, 43)]; 127.3 [s, C(35, 37)]; 126.5 [s, C(16)]; 124.9 [s,  $\text{C}_\alpha$ (19)]; 80.0 [s, C(17)]; 67.3 [s, C(47)]; 50.3 [s, C(45)]



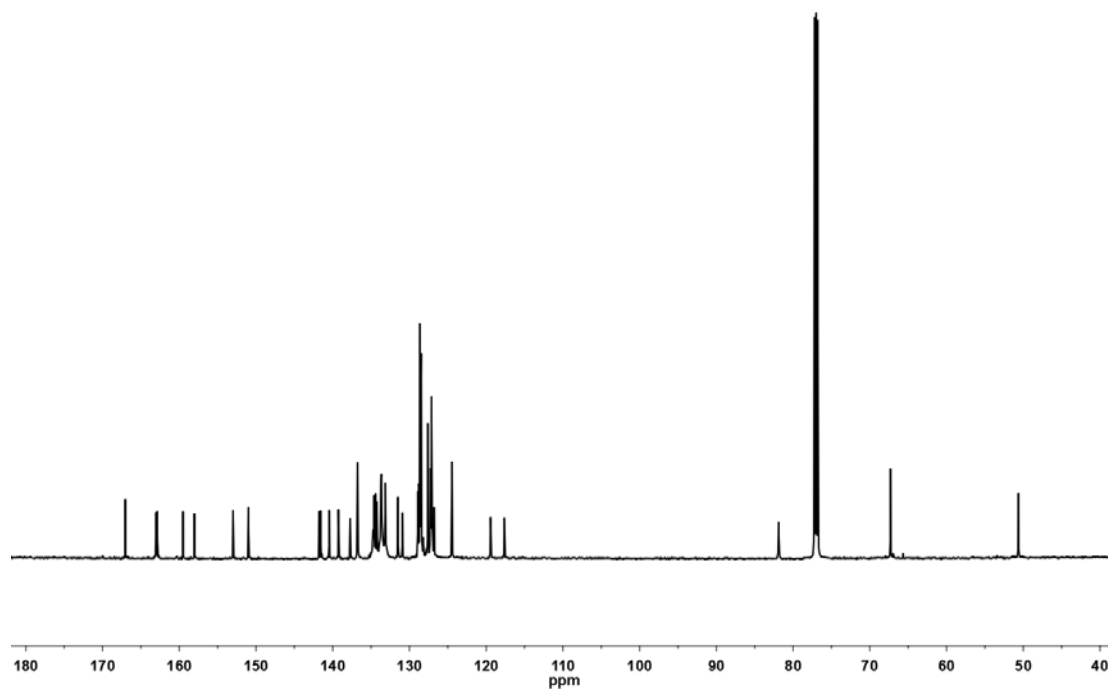

Fig. S11.  $^{13}\text{C}$  NMR spectra for **9** at 150.87 MHz in  $\text{CDCl}_3$  at  $25^\circ\text{C}$

$^{13}\text{C}$  NMR (150.85 MHz,  $\text{CDCl}_3$ ,  $25^\circ\text{C}$ , partial data) of **9** :

$\delta$ 167.0 [s, C(46)]; 163.6 (s) and 151.0 (s) for  $\text{C}_\alpha$ (1) and  $\text{C}_\alpha$ (4); 162.9 (s) and 153.0 (s) for  $\text{C}_\alpha$ (11) and  $\text{C}_\alpha$ (14); 159.5 (s) and 158.0 (s) for  $\text{C}_\alpha$ (6) and  $\text{C}_\alpha$ (9); 140.5 [s, C(39)] ; 139.3 [s, C(33)] ; 137.7 [s, C(20)]; 136.8 [s, C(40, 44)] ;  $\delta$ 134.7 [s, C(34, 38)]; 134.6 [s, C(48)]; 134.4 [s,  $\text{C}_\beta$ (2)]; 134.2 [s,  $\text{C}_\beta$ (8)]; 133.7 [s,  $\text{C}_\beta$ (7)]; 133.6 [s,  $\text{C}_\beta$ (13)]; 133.2 [s,  $\text{C}_\beta$ (12)]; 133.2 [s,  $\text{C}_\beta$ (3)] ; 130.9 [s, C(18)]; 128.9 [s, C(42)]; 128.8 [s, C(36)]; 128.5 (s) and 127.1 (s) for C(49, 53); 127.6 [s, C(41, 43)]; 127.3 [s, C(35, 37)]; 126.8 [s, C(16)]; 124.5 [s,  $\text{C}_\alpha$ (19)]; 81.9 [s, C(17)]; 67.3 [s, C(47)]; 50.6 [s, C(45)]

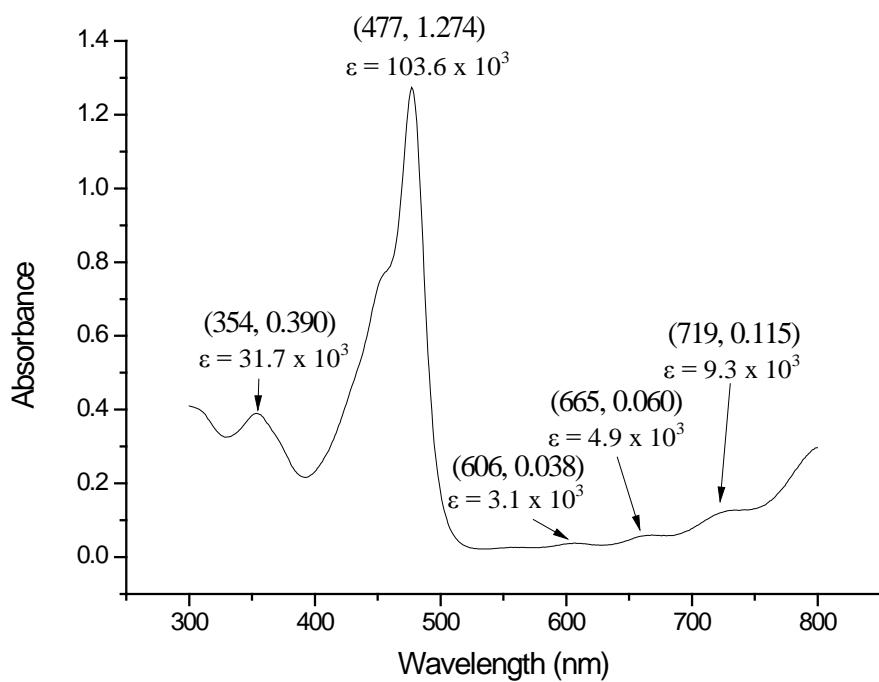

Fig. S12. UV-Vis spectra of **5** in  $\text{CH}_2\text{Cl}_2$  at 300 K : 300 – 800 nm

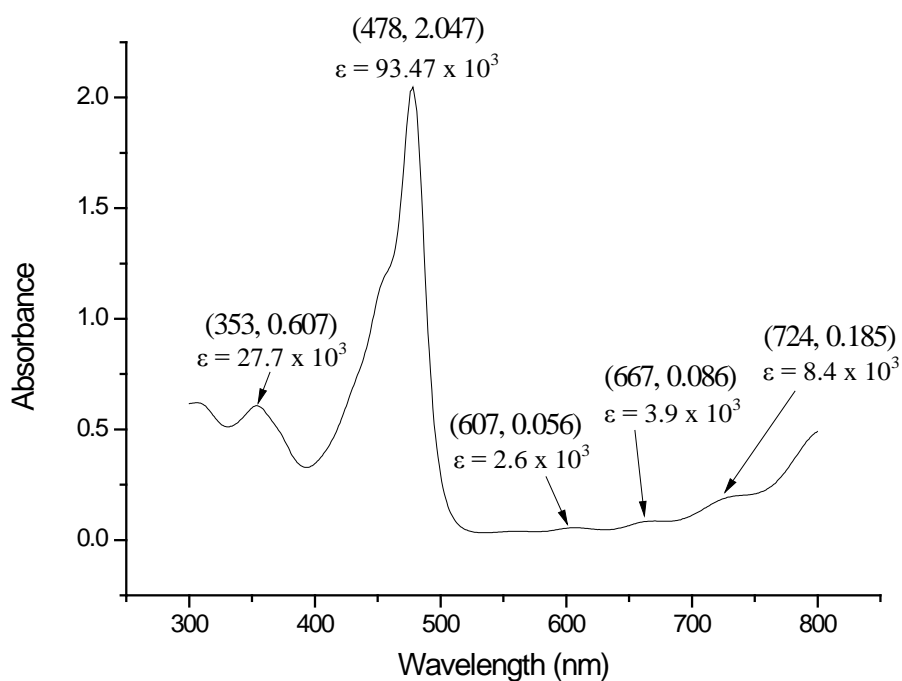

Fig. S13. UV-Vis spectra of **6** in  $\text{CH}_2\text{Cl}_2$  at 300 K : 300 – 800 nm

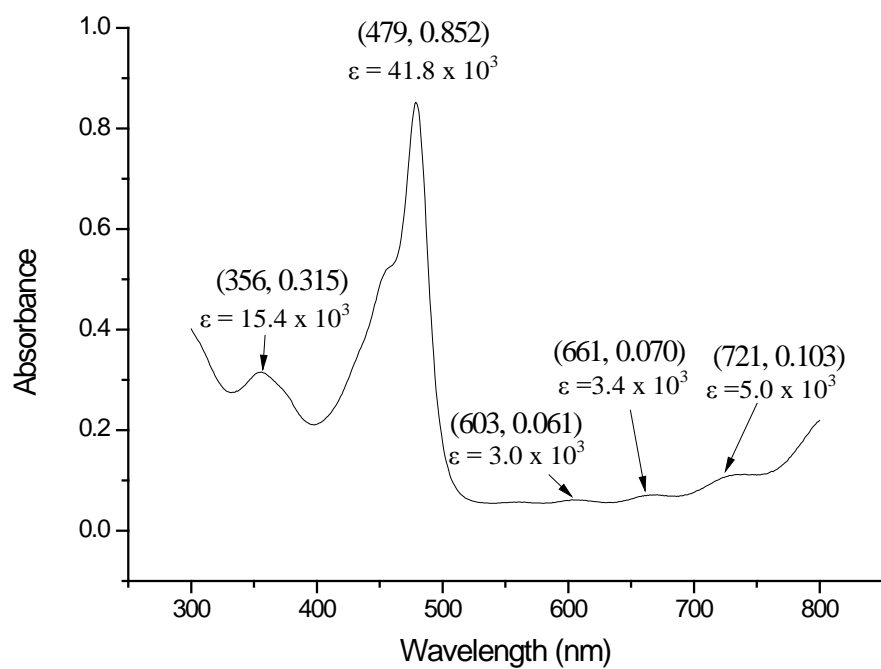

Fig. S14. UV-Vis spectra of **7** in  $\text{CH}_2\text{Cl}_2$  at 300 K : 300 – 800 nm

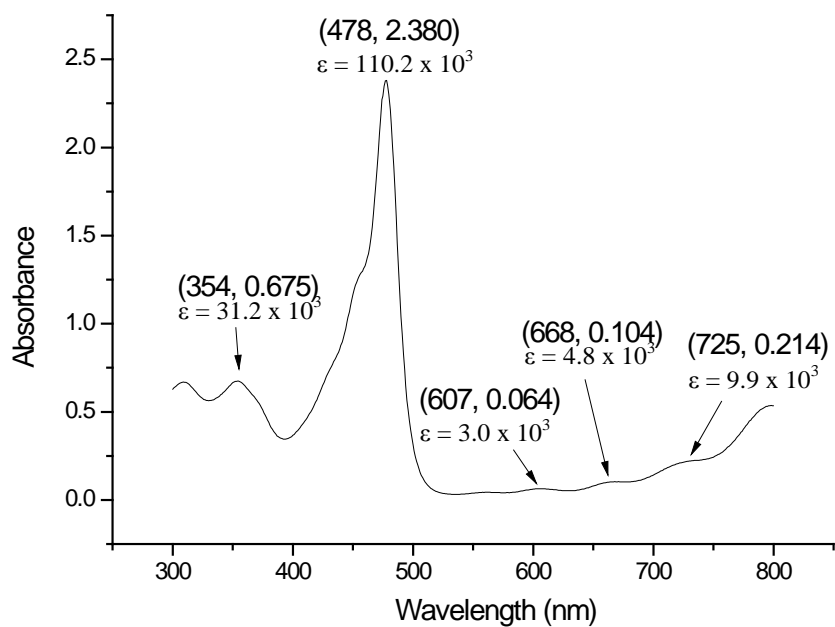

Fig. S15. UV-Vis spectra of **4** in  $\text{CH}_2\text{Cl}_2$  at 300 K : 300 – 800 nm

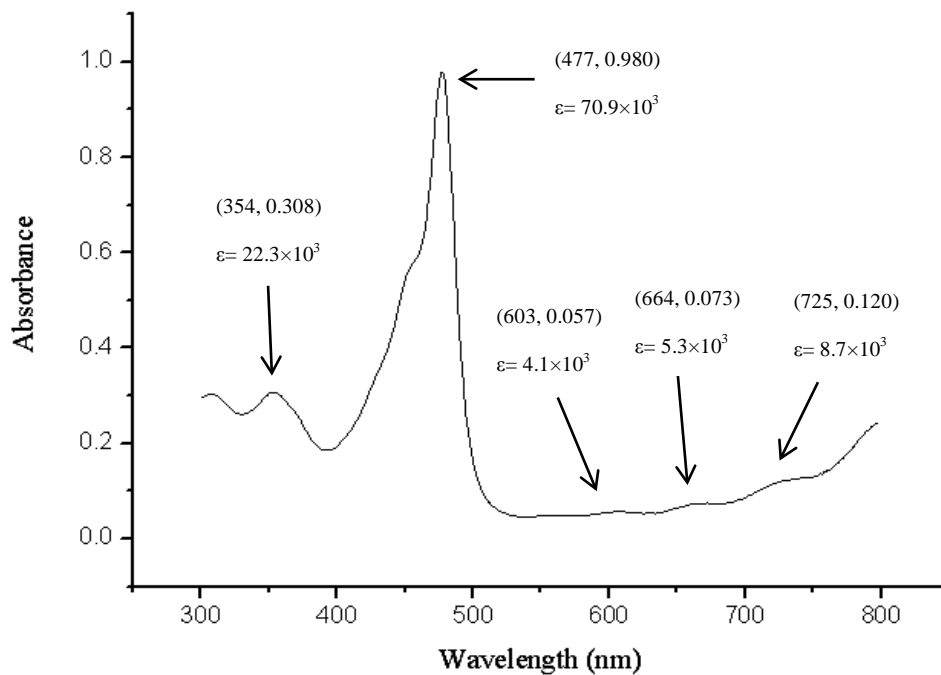

Fig. S16. UV-Vis spectra of **8** in CH<sub>2</sub>Cl<sub>2</sub> at 300 K : 300 – 800 nm

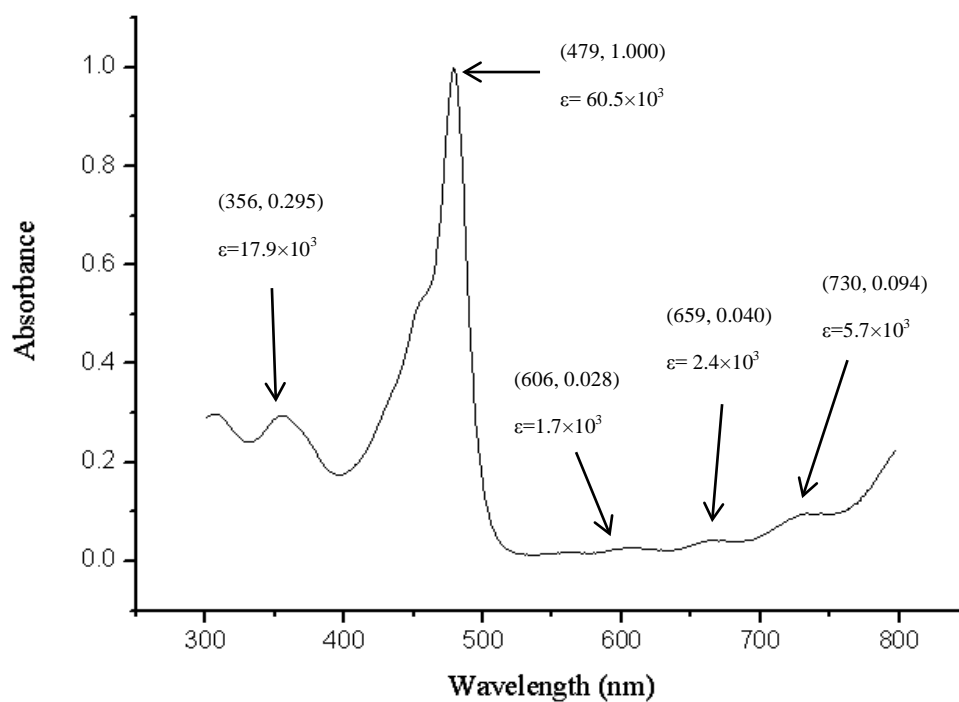

Fig. S17. UV-Vis spectra of **9** in CH<sub>2</sub>Cl<sub>2</sub> at 300 K : 300 – 800 nm

## Comparison of empirical formula between data of X-ray diffraction and EA measurement

The X-ray structure data were obtained from single crystal. Moreover, all of elemental analyses data were measured from the powder sample through recrystallization, not from single crystal. Hence, solvent molecule might be different between the data of X-ray diffraction and elemental analyses. Hence, X-ray diffraction data indicates the empirical formula of  $4 \cdot C_8H_{10}$  (or **5-9**), but elemental analyses shows  $4 \cdot 0.1C_6H_{14}$  (or **5**  $\cdot 0.4 C_8H_{18}$ , **6**  $\cdot 0.3 C_8H_{18}$ , **7**  $\cdot 0.2 C_3H_7NO$ , **8, 9**) for the same complexes. Compound **4** was dissolved in  $CH_2Cl_2$  and layered with hexane to afford green powder sample for elemental analyses.
